# Supplementary material
Source: PubMed Central journal article supplement (PMC2861865)
Supplement: NIHMS102168-supplement-5.pdf [file NIHMS102168-supplement-5.pdf]

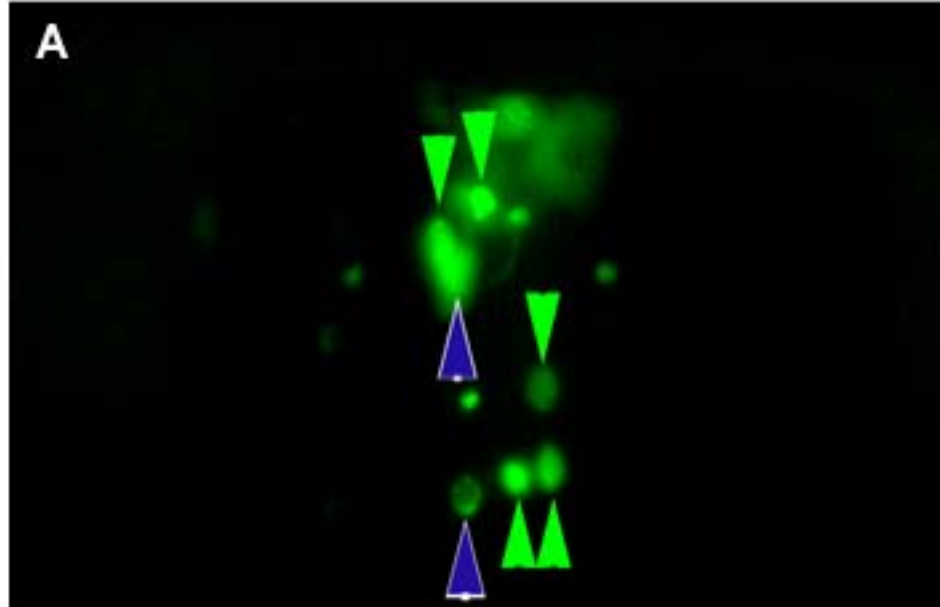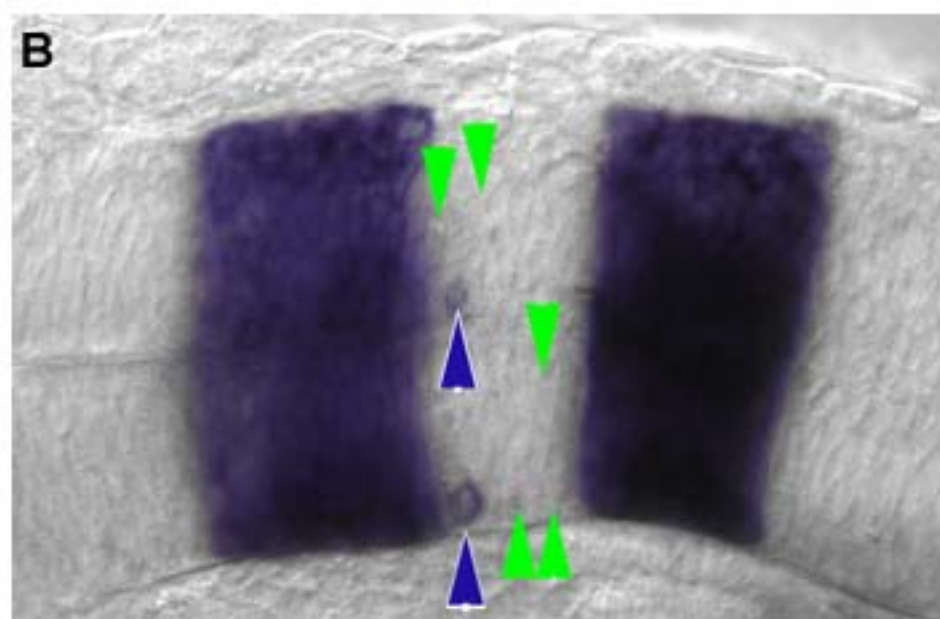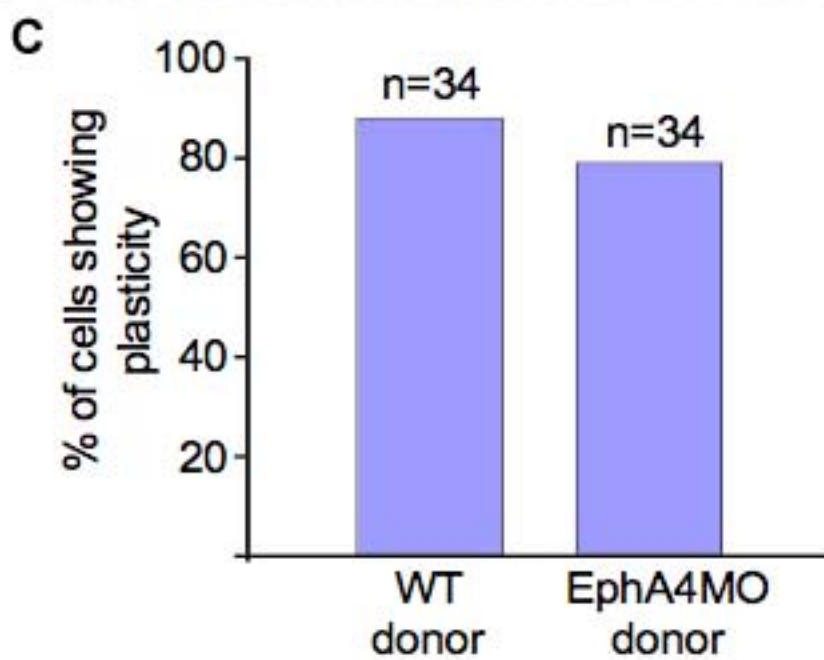

Fig S5

Mis-localized hindbrain cells exhibit plasticity independently of EphA4

(A,B) dorsal views of the same 18 hpf embryo. (A) green cells were transplanted from r3 of a donor embryo into r4 of a host embryo at the 10-12 somite stage. (B) RNA in situ hybridization showing *krox20/egr2b* expression. Green arrows indicate cells that have changed their identity, blue arrows indicate cells that have retained r3 identity. (C) EphA4 is not required for plasticity. The proportion of cells that turn off *krox20/egr2b* under these transplantation conditions is unaffected if the transplanted cells lack EphA4.
